# Supplementary material for: Association between the Cytosine Hydroxymethylation and the Expression of microRNA in Multiple Sclerosis in Polish Population
Source: MDPI journal article supplement (doi:10.3390/ijms241813923), 2023-09-10
Supplement: s1 [file s1]

**Table S1.** Primer sequences for methylation and hydroxymethylation analysis.

| miRNA   | Forward Primer        | Reverse Primer        |
|---------|-----------------------|-----------------------|
| miR-155 | GCAATGACCCACGAGAAAGGG | GCCTGTTCTTGGAACCTACAG |
|         | GACTCAGTGGTGTGCGCTC   | CAGGTACGTCCCCAACCATC  |
| miR-223 | GGGTGTCACTCGGGCTTTAC  | TTCCTGGGAGATGTGACCCT  |
|         | AGACAAGGCTGAATCCCTCTG | CCAGAAATGGTAAACTGCCCC |
| miR-326 | AAGCTTAGTGCACAGGGTCA  | GCGATAAAGGAAGAGGGCAGA |

**Table S2.** The qPCR conditions for methylation and hydroxymethylation analysis.

| Step                 | Temperature | Time   | Number of cycles |
|----------------------|-------------|--------|------------------|
| Initial denaturation | 95°C        | 10 min | —                |
| Denaturation         | 95°C        | 15 s   | 40               |
| Annealing            | 60°C        | 30 s   |                  |
| Extension            | 72°C        | 30 s   |                  |

**Table S3.** The qPCR conditions for miRNA expression analysis. .

| QRT reaction            |             |        |                  |
|-------------------------|-------------|--------|------------------|
| Step                    | Temperature | Time   |                  |
| Reverse transcription   | 16°C        | 30 min |                  |
|                         | 42°C        | 30 min |                  |
| Stop reaction           | 85°C        | 5 min  |                  |
| qPCR                    |             |        |                  |
| Step                    | Temperature | Time   | Number of cycles |
| Enzyme activation       | 95°C        | 10 min | —                |
| Denaturation            | 95°C        | 15 s   | 40               |
| Annealing and extension | 60°C        | 60 s   |                  |
